# Issues and Updates

## ADA Events

### 12th Annual Southern Regional Conference on Diabetes Mellitus

22–25 May 1997

Orlando, FL

**Location:** Buena Vista Palace at Walt Disney World Village

**Sponsorship:** The American Diabetes Association, Alabama, Florida, Georgia, North Carolina, South Carolina, Tennessee, and Virginia Affiliates

**Topics:** Improving patient outcomes, insulin resistance and hyperandrogenism, ecology of managed care, prevention, behavior change, diabetes update, women's health issues, new treatment strategies, complications, and more.

**Contact:** American Diabetes Association/Florida Affiliate, 1101 N. Lake Destiny Rd., Suite 415, Maitland, FL 32751. Tel: 800-741-5698. Fax: 407-660-1080.

### 57th Annual Meeting and Scientific Sessions

21–24 June 1997

Boston, MA

**Location:** Hynes Convention Center

**Sponsorship:** The American Diabetes Association

**Contact:** American Diabetes Association, 1660 Duke St., Alexandria, VA 22314. Tel: 800-232-3472, select option 5; for faxed information, 703-299-5513. Fax: 703-683-1839 or 703-683-1351. E-mail: meetings@diabetes.org.

### Diabetes in Minorities: A Practical Clinical Approach

16–17 August 1997

Phoenix, AZ

**Location:** Holiday Inn, Corporate Hotel

**Sponsorship:** The American Diabetes Association, Arizona Affiliate

**Contact:** The American Diabetes Association, Arizona Affiliate, 2328 W. Royal Palm Rd., Suite D, Phoenix, AZ 85021. Tel: 602-995-1515. Fax: 602-995-0004.

## Other Events

### Second Scientific Meeting of the Hypertension in Diabetes (HID) European Association for the Study of Diabetes (EASD) Study Group

25–26 April 1997

Lund, Sweden

**Sponsorship:** EASD

**Contact:** Dr. Peter T. Sawicki, Department of Metabolic Diseases, Heinrich-Heine University of Düsseldorf, P.O. Box 10 10 07, D-40001 Düsseldorf, Germany. Tel: 49-211-811-7836. Fax: 49-211-811-7836.

### 10th Annual General Meeting of the European Diabetic Nephropathy Study Group (EDNSG)

16–17 May 1997

Bratislava, Slovakia

**Sponsorship:** EDNSG, an Official Study Group of the European Association for the Study of Diabetes

**Contact:** Ruggero Mangili, MD, Divisione Medicina I, Istituto Scientifico San Raffaele, Via Olgettina 60, I-20132 Milan, Italy. Tel: 39-2-2643-2121. Fax: 39-2-2643-3790. E-mail: mangili@rsisi.hsr.it.

### 9th International Dresden Symposium on Lipoproteins and Atherosclerosis

27–29 June 1997

Dresden, Germany

**Sponsorship:** Technical University Dresden  
**Contact:** Prof. Dr. Ulrich Julius, Technical University Dresden, Medical Faculty, "Carl Gustav Carus", Fetscherstr. 74, 01307 Dresden, Germany. Tel: 49-351-4582306. Fax: 49-351-4585306. E-mail: julius@rcs.urz.tu-dresden.de.

### IDF Satellite Meeting:

#### Insulin Action and Insulin Resistance: New Targets for Therapy

13–17 July 1997

St. Petersburg, Russia

**Contact:** Boris Draznin, MD, PhD, Department of Medicine, University of Colorado Health Sciences Center (B178), 4200 East 9th Ave., Denver, CO 80262. Tel: 303-399-8020, ext. 3143. Fax: 303-393-4173. E-mail: bdraznin@sembilan.uchsc.edu.

### Workshop on Lessons From Animal Diabetes VI

14–17 July 1997

### Bagsvaerd, Denmark

**Location:** Novo Nordisk Campus

**Sponsorship:** Novo Nordisk A/S; a satellite of the 16th IDF Congress, Helsinki

**Contact:** Karin Christiansen, Carlson Wagonlit Travel, Nyropsgade 47 IV, DK-1602 Copenhagen V, Denmark.

### 4th International Symposium on Diabetic Neuropathy

15–19 July 1997

The Netherlands

**Sponsorship:** Satellite to the 16th IDF Congress in combination with Neurodiab VII, the annual meeting of the Diabetic Neuropathy Study Group of the European Association for the Study of Diabetes

**Contact:** Congrex Holland bv, PO Box 302, 1000 AH, Amsterdam, The Netherlands. Tel: 31-20-626-1372. Fax: 31-20-625-9574. E-mail: neuro97@congrex.nl.

### 16th International Diabetes Federation (IDF) Congress

20–25 July 1997

Helsinki, Finland

**Location:** Helsinki Fair Center

**Sponsorship:** The Finnish Diabetes Association and the IDF

**Contact:** Congress Secretariat, 16th IDF Congress, Congrex (Sweden) AB, P.O. Box 211 73, S-100 31 Stockholm, Sweden. Tel: 46-8-612-6900. Fax: 46-8-612-6292. E-mail: idf97@congrex.se. Internet: www.diabetes.fi/idf97.

### Genetics of Diabetes: Satellite Meeting of the 16th IDF Congress

25–27 July 1997

Ystad, Sweden

**Location:** Ystad Saltsjöbad

**Contact:** Genetics of Diabetes—Congress Secretariat, Wallenberg Laboratory, Department of Endocrinology, Malmö University Hospital, S-20502 Malmö, Sweden. Tel: 46-40332395. Fax: 46-40337042. E-mail: info.ystad@endo.mas.lu.se.

### Advances in Tissue Engineering

11–15 August 1997

Houston, TX

**Location:** Rice University

**Sponsorship:** Rice University Institute of Biosciences and Bioengineering and Rice University School of Continuing Studies

**Contact:** Rice University School of Continuing Studies, MS 550, 6100 Main St., Houston, TX 77005-1892. Tel: 713-520-6022. Fax: 713-285-5213. E-mail: [scs@rice.edu](mailto:scs@rice.edu). Internet: <http://www.rice.edu/scs/tissue>.

**Lipids, Insulin Resistance and Obesity  
15-18 August 1997  
Aspen, CO**

**Location:** Given Biomedical Institute of the University of Colorado School of Medicine

**Sponsorship:** Kern Aspen Lipid Conference

**Contact:** Mary Sheron, Executive Director, Kern Aspen Lipid Conference, 4200 E. 9th Ave., Box B145, Denver, CO 80262. Tel: 303-315-8567. Fax: 303-315-7180. E-mail: [mary.sheron@uchsc.edu](mailto:mary.sheron@uchsc.edu).

## *Announcements*

**American Board of Internal Medicine  
Examinations:**

**1997 ABIM Recertification  
Examinations in Internal Medicine,  
Its Subspecialties, and Added  
Qualifications**

**Registration period:** Ongoing and continuous since 1 July 1996

**Final examination date:** 19 November 1997

**Contact:** Registration Section, American Board of Internal Medicine, 3624 Market St., Philadelphia, PA 19104-2675. Tel: 800-441-2246 or 215-243-1500. Fax: 215-243-1590. E-mail: [request@abim.org](mailto:request@abim.org).
